# Supplementary material for: Cyclovirobuxine D Induced-Mitophagy through the p65/BNIP3/LC3 Axis Potentiates Its Apoptosis-Inducing Effects in Lung Cancer Cells
Source: MDPI journal article supplement (doi:10.3390/ijms22115820), 2021-05-29
Supplement: s1 [file s1]

Table S1. Down-regulated mitochondria-related genes (CVB-D vs Ctrl)

| Gene        | Log2FC(CVB-D/Ctrl) | P-value     | significant | regulate |
|-------------|--------------------|-------------|-------------|----------|
| 1 MT-CO2    | -2.963754763       | 0.0000514   | yes         | down     |
| 2 MTND6P3   | -2.882140997       | 1.42E-56    | yes         | down     |
| 3 MFF       | -2.811751669       | 0.000182861 | yes         | down     |
| 4 FIS1      | -2.811751669       | 0.000182861 | yes         | down     |
| 5 TOMM70    | -2.784784622       | 1.67E-10    | yes         | down     |
| 6 CKMT1B    | -2.768287479       | 6.8E-19     | yes         | down     |
| 7 PMPCA     | -2.750351125       | 0.000029    | yes         | down     |
| 8 AFM1      | -2.683761747       | 1.48E-41    | yes         | down     |
| 9 MTCO1P12  | -2.648252937       | 1.36E-13    | yes         | down     |
| 10 RMRP     | -2.585643832       | 9.28E-45    | yes         | down     |
| 11 MSTO1    | -2.561314244       | 0           | yes         | down     |
| 12 OXA1L    | -2.499807663       | 0.00000832  | yes         | down     |
| 13 MTCO1P28 | -2.485545454       | 1.45E-15    | yes         | down     |
| 14 MT-RNR2  | -2.479211316       | 2.86E-41    | yes         | down     |
| 15 MT-CO3   | -2.41121374        | 9.92E-09    | yes         | down     |
| 16 FMC1     | -2.373630557       | 0.00000775  | yes         | down     |
| 17 ATP5F1P5 | -2.271183288       | 0.00000699  | yes         | down     |
| 18 TOMM22   | -2.247599356       | 2.63E-12    | yes         | down     |
| 19 IMMT     | -2.19641552        | 7.15E-32    | yes         | down     |
| 20 ATP5A1   | -2.150553583       | 3.61E-66    | yes         | down     |
| 21 ATPAF1   | -2.138732992       | 1.99E-19    | yes         | down     |
| 22 MTCO3P12 | -2.113826491       | 0.00000351  | yes         | down     |
| 23 ALDH2    | -2.111311951       | 0.000000222 | yes         | down     |
| 24 LARS2    | -2.077133946       | 4.16E-50    | yes         | down     |
| 25 MT-ND4   | -2.036716963       | 2.53E-21    | yes         | down     |
| 26 MT-ND6   | -2.015341433       | 1.43E-60    | yes         | down     |
| 27 VARS2    | -1.959359649       | 1.84E-98    | yes         | down     |
| 28 CKMT1A   | -1.949255193       | 0.0000454   | yes         | down     |
| 29 ATP5G1   | -1.880233701       | 2.96E-166   | yes         | down     |
| 30 MTCO2P12 | -1.870379399       | 2.7E-72     | yes         | down     |
| 31 MTND4P20 | -1.835999216       | 7.19E-09    | yes         | down     |
| 32 MTG1     | -1.766785403       | 4.3E-11     | yes         | down     |
| 33 ATP5B    | -1.686220787       | 0.000222072 | yes         | down     |
| 34 MTCO3P39 | -1.641826668       | 0.0000664   | yes         | down     |
| 35 MGME1    | -1.596900797       | 4.62E-13    | yes         | down     |
| 36 MRPL50   | -1.584341173       | 0.0000828   | yes         | down     |
| 37 MTCO1P22 | -1.547776465       | 1.11E-31    | yes         | down     |
| 38 MRPS31P5 | -1.534110274       | 0.00013835  | yes         | down     |
| 39 MCCD1P1  | -1.48089045        | 7.54E-50    | yes         | down     |
| 40 NADK2    | -1.443413109       | 1.21E-31    | yes         | down     |
| 41 MRPS14   | -1.419434247       | 1.41E-55    | yes         | down     |
| 42 MPC1     | -1.37598399        | 1.61E-25    | yes         | down     |
| 43 MTFR1L   | -1.363267841       | 2.96E-11    | yes         | down     |
| 44 MRPL38   | -1.342960908       | 2.48E-12    | yes         | down     |
| 45 MT-TS1   | -1.323300145       | 0.000029    | yes         | down     |
| 46 MT-ATP6  | -1.267927863       | 2.4E-16     | yes         | down     |
| 47 MRPL11   | -1.255358321       | 0.000231086 | yes         | down     |
| 48 MT-CO1   | -1.225122276       | 9.24E-12    | yes         | down     |
| 49 MECR     | -1.202541622       | 0.000128716 | yes         | down     |
| 50 VDAC1    | -1.169265467       | 2.39E-32    | yes         | down     |
| 51 MRPL12   | -1.155762804       | 1.59E-08    | yes         | down     |
| 52 GTPBP3   | -1.135444331       | 5.94E-25    | yes         | down     |
| 53 MRPS7    | -1.126888236       | 7.63E-08    | yes         | down     |
| 54 TIMM10   | -1.098781556       | 0.00000494  | yes         | down     |
| 55 MPV17L   | -1.084770164       | 1.01E-25    | yes         | down     |
| 56 MTERF4   | -1.056864167       | 6.99E-08    | yes         | down     |
| 57 METAP1D  | -1.039330537       | 1.48E-10    | yes         | down     |
| 58 MICU3    | -1.030208227       | 0.00000529  | yes         | down     |
| 59 MRPL28   | -1.014762015       | 9.25E-68    | yes         | down     |
| 60 MRPL58   | -0.994785295       | 1.98E-08    | yes         | down     |
| 61 TOMM40   | -0.983363047       | 7.5E-27     | yes         | down     |
| 62 MRPS9    | -0.982802349       | 0.000000113 | yes         | down     |
| 63 MTF2     | -0.979328483       | 0.00014144  | yes         | down     |
| 64 ATP5C1   | -0.96085164        | 2.99E-10    | yes         | down     |
| 65 MRPS28   | -0.956141579       | 5.16E-11    | yes         | down     |
| 66 TIMM8B   | -0.942996203       | 3.09E-14    | yes         | down     |
| 67 MIPEP    | -0.934205035       | 1.42E-44    | yes         | down     |
| 68 NARS2    | -0.930898935       | 2.24E-10    | yes         | down     |
| 69 TIMM29   | -0.922455134       | 6.94E-11    | yes         | down     |
| 70 MTERF2   | -0.919517723       | 4.33E-25    | yes         | down     |
| 71 TIMM23   | -0.914489775       | 2.62E-17    | yes         | down     |
| 72 SARS2    | -0.91377152        | 1.62E-23    | yes         | down     |
| 73 ATP5O    | -0.901383771       | 6.6E-09     | yes         | down     |
| 74 MRPL41   | -0.88688871        | 1.53E-16    | yes         | down     |
| 75 MRPL40   | -0.876291921       | 2.61E-09    | yes         | down     |
| 76 OPA3     | -0.867723964       | 7.42E-13    | yes         | down     |
| 77 PCK2     | -0.853377215       | 1.73E-18    | yes         | down     |
| 78 COX4I1   | -0.827404934       | 7.76E-14    | yes         | down     |
| 79 CLUHP3   | -0.821107481       | 4.33E-12    | yes         | down     |
| 80 PARS2    | -0.672588922       | 0.000122244 | yes         | down     |
| 81 TOMM20   | -0.661148943       | 5.27E-10    | yes         | down     |
| 82 IDH2     | -0.616441349       | 2.12E-19    | yes         | down     |
| 83 AFM2     | -0.615068995       | 1.05E-41    | yes         | down     |

**Table S1.** Total down-regulated mitochondria-related genes upon CVB-D treatment in A549 cells was shown. The genes expression was compared between control and 30  $\mu$ M CVB-D treated cells by transcriptome analysis. The mitochondria-related genes down-regulated upon CVB-D treatment was shown.

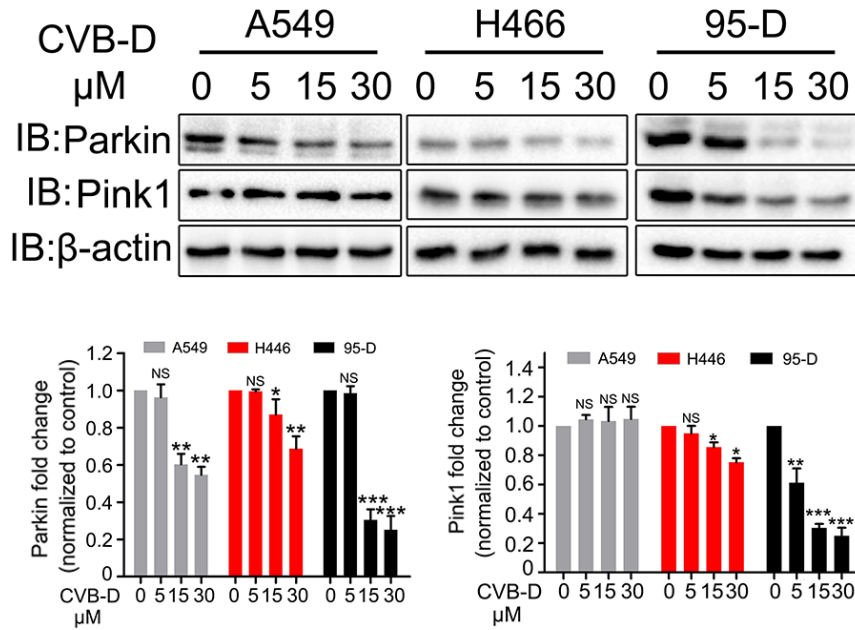

**Figure S1.** Immunoblotting analysis of Parkin and Pink1 expression upon CVB-D treatment in lung cancer cells. The expression of Parkin and Pink1 in lung cancer cells treated with or without 30  $\mu$ M CVB-D for 24 h was detected by immunoblotting. Beta-actin was used as loading control.

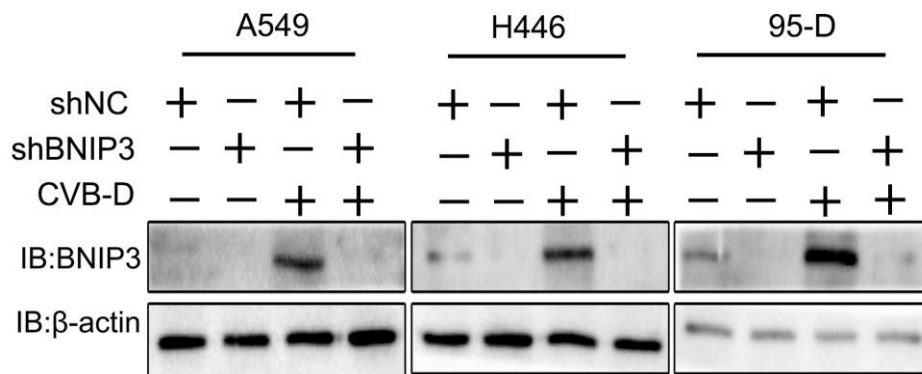

**Figure S2.** Immunoblotting analysis of BNIP3 expression upon CVB-D treatment in lung cancer cells. Western blotting analysis was performed to detect the expression of BNIP3 in shBNIP3 or shNC lung cancer cells treated with or without 30  $\mu$ M CVB-D for 24 h. Beta-actin was used as loading control.

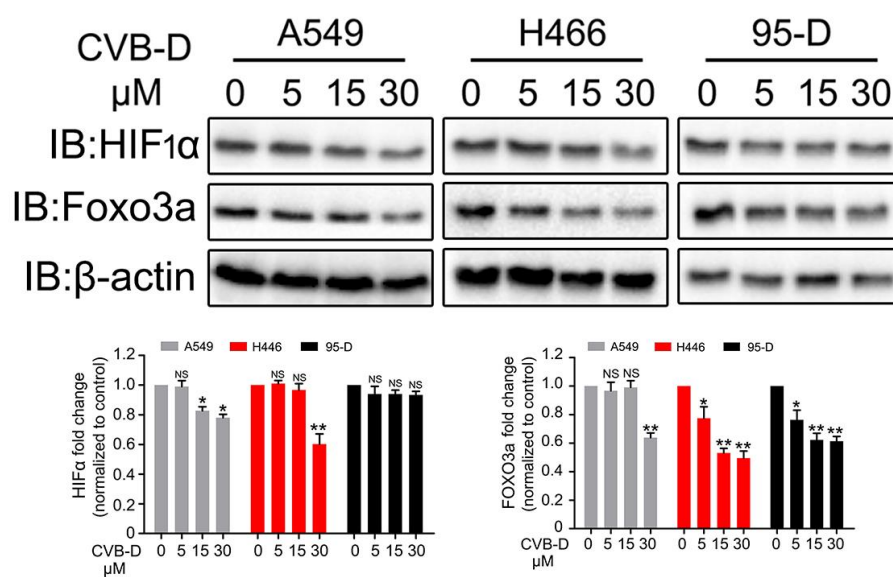

**Figure S3.** Immunoblotting analysis of HIF1α and FOXO3a expression upon CVB-D treatment in lung cancer cells. The expression of HIF1α and Foxo3a in lung cancer cells treated with or without 30 μM CVB-D for 24 h was detected by immunoblotting. Beta-actin was used as loading control.
